# Supplementary material for: Hemoadsorption Therapy for Critically Ill Patients with Acute Liver Dysfunction: A Meta-Analysis and Systematic Review
Source: MDPI journal article supplement (doi:10.3390/biomedicines12010067), 2023-12-27
Supplement: s1 [file s1]

**Hemoadsorption therapy compared to no treatment for critically ill with acute liver dysfunction**

**Patient or population:** critically ill with acute liver dysfunction

**Setting:**

**Intervention:** hemoadsorption therapy

**Comparison:** no treatment

| Outcomes                     | № of participants (studies) Follow-up | Certainty of the evidence (GRADE) | Relative effect (95% CI) | Anticipated absolute effects |                                                       |
|------------------------------|---------------------------------------|-----------------------------------|--------------------------|------------------------------|-------------------------------------------------------|
|                              |                                       |                                   |                          | Risk with no treatment       | Risk difference with hemoadsorption therapy           |
| Total bilirubin (pooled)     | 4 (4 observational studies)           | ⊕⊕○○ Low                          | -                        | -                            | MD <b>4.79 mg/dL lower</b> (6.25 lower to 3.33 lower) |
| Creatinine (pooled)          | 3 (3 observational studies)           | ⊕⊕○○ Low                          | -                        | -                            | MD <b>0.38 mg/dL lower</b> (1.27 lower to 0.5 higher) |
| ALT (individual)             | 7 (7 observational studies)           | ⊕⊕○○ Low                          | -                        | -                            | <b>0</b> (0 to 0 )                                    |
| AST (individual)             | 8 (8 observational studies)           | ⊕⊕○○ Low                          | -                        | -                            | <b>0</b> (0 to 0 )                                    |
| Creatinine (individual)      | 6 (6 observational studies)           | ⊕⊕○○ Low                          | -                        | -                            | <b>0</b> (0 to 0 )                                    |
| CRP (individual)             | 7 (7 observational studies)           | ⊕⊕○○ Low                          | -                        | -                            | <b>0</b> (0 to 0 )                                    |
| Total bilirubin (individual) | (7 observational studies)             | ⊕⊕○○ Low                          | -                        | -                            | <b>0</b> (0 to 0 )                                    |

Hemoadsorption therapy compared to no treatment for critically ill with acute liver dysfunction

Patient or population: critically ill with acute liver dysfunction

Setting:

Intervention: hemoadsorption therapy

Comparison: no treatment

| Outcomes                      | № of participants (studies) Follow-up | Certainty of the evidence (GRADE) | Relative effect (95% CI) | Anticipated absolute effects |                                             |
|-------------------------------|---------------------------------------|-----------------------------------|--------------------------|------------------------------|---------------------------------------------|
|                               |                                       |                                   |                          | Risk with no treatment       | Risk difference with hemoadsorption therapy |
| Vasopressor need (individual) | 7 (7 observational studies)           | ⊕⊕○○ Low                          | -                        | -                            | 0 (0 to 0 )                                 |

\*The risk in the intervention group (and its 95% confidence interval) is based on the assumed risk in the comparison group and the relative effect of the intervention (and its 95% CI).

CI: confidence interval; MD: mean difference

GRADE Working Group grades of evidence

- High certainty: we are very confident that the true effect lies close to that of the estimate of the effect.
- Moderate certainty: we are moderately confident in the effect estimate: the true effect is likely to be close to the estimate of the effect, but there is a possibility that it is substantially different.
- Low certainty: our confidence in the effect estimate is limited: the true effect may be substantially different from the estimate of the effect.
- Very low certainty: we have very little confidence in the effect estimate: the true effect is likely to be substantially different from the estimate of effect.
