# Supplementary material for: Hemoadsorption Therapy for Critically Ill Patients with Acute Liver Dysfunction: A Meta-Analysis and Systematic Review
Source: Biomedicines. 2023 Dec 27;12(1):67. doi: 10.3390/biomedicines12010067 (PMC10813081; doi:10.3390/biomedicines12010067)
Supplement: Supplementary file 1 [file biomedicines-12-00067-s001.zip]

Archive with 7 entries (7 files):
- Figure S1 - zero correlation bilirubin.png
- Figure S2 - zero correlation creatinine.png
- Figure S3 - ROBINS-I.png
- Figure S4 - JBI Case reports.png
- Figure S5 - JBI Case series.png
- Table S1 - GRADE.pdf
- Table S2 - HA LIVER PRISMA_2020_checklist.pdf
